# Supplementary material for: The pan-JAK inhibitor LAS194046 reduces neutrophil activation from severe asthma and COPD patients in vitro
Source: PubMed Central journal article supplement (PMC8948298; doi:10.1038/s41598-022-09241-6), 2022-03-24
Supplement: 41598_2022_9241_MOESM1_ESM.pdf [file 41598_2022_9241_MOESM1_ESM.pdf]

## SUPPLEMENTARY INFORMATION

### TITLE

**The pan-JAK Inhibitor LAS194046 reduces neutrophil activation from severe asthma and COPD patients *in vitro***

### Authors

Javier Milara<sup>1,2,3\*</sup> Beatriz Ballester<sup>1,3\*</sup>, Alfredo de Diego<sup>4</sup>, Marta Calbet,<sup>5</sup> Isabel Ramis,<sup>5</sup> Montserrat Miralpeix,<sup>5</sup> Julio Cortijo<sup>1,3,6</sup>

### Affiliations

<sup>1</sup>Department of Pharmacology, Faculty of Medicine, University of Valencia, Spain

<sup>2</sup>Pharmacy Unit, University General Hospital Consortium, Valencia, Spain

<sup>3</sup>CIBERES, Health Institute Carlos III, Valencia, Spain

<sup>4</sup>Respiratory Unit, University and Polytechnic La Fe Hospital, Valencia, Spain

<sup>5</sup>Almirall, R&D Centre, Barcelona, Spain

<sup>6</sup>Research and teaching Unit, University General Hospital Consortium, Valencia, Spain

\*Both authors contributed equally to this work

## Supplementary tables

**Table S1: Clinical features of COPD patients.** COPD: chronic obstructive pulmonary disease; FEV1: forced expiratory volume in one second; FVC: forced vital capacity; Pack-yr = 1 year smoking 20 cigarettes-day. Data are mean  $\pm$  SD. \*  $p < 0.05$  related to Healthy subjects

|                                       | Healthy<br>(n=23)                             | COPD<br>(n= 23)                               |
|---------------------------------------|-----------------------------------------------|-----------------------------------------------|
| Age, yr                               | 66 $\pm$ 6                                    | 65.5 $\pm$ 11                                 |
| Sex (M/F)                             | 13/10                                         | 18/5                                          |
| Tobacco consumption, pack-yr          | 0                                             | 36.2 $\pm$ 11                                 |
| FEV1, % pred                          | 99 $\pm$ 6                                    | 32.1 $\pm$ 9*                                 |
| FVC, % pred                           | 96 $\pm$ 3                                    | 90.1 $\pm$ 11                                 |
| FEV1/FVC %                            | 96 $\pm$ 7                                    | 51.2 $\pm$ 4*                                 |
| Receiving inhaled steroids, no.       | 0                                             | 19*                                           |
| Receiving theophylline, no.           | 0                                             | 0                                             |
| Receiving long-acting b2-agonist, no. | 0                                             | 19*                                           |
| Receiving anticholinergics, no.       | 0                                             | 18*                                           |
| Receiving roflumilast, no.            | 0                                             | 4*                                            |
| Total peripheral blood neutrophils    | 4.2 $\pm$ 0.3 cells x<br>10 <sup>9</sup> /L   | 8.2 $\pm$ 1.3 cells x<br>10 <sup>9</sup> /L*  |
| Total peripheral blood eosinophils    | 0.09 $\pm$ 0.01 cells x<br>10 <sup>9</sup> /L | 0.08 $\pm$ 0.02 cells x<br>10 <sup>9</sup> /L |

**Table S2: Clinical features of asthma patients.** FEV1: forced expiratory volume in one second; FVC: forced vital capacity; Pack-yr = 1 year smoking 20 cigarettes-day. Data are mean  $\pm$  SD. \*  $p < 0.05$  related to Healthy subjects. na: not apply

|                                      | Healthy<br>(n=23)                             | Asthma<br>(n= 21)                               |
|--------------------------------------|-----------------------------------------------|-------------------------------------------------|
| Age, yr                              | 66 $\pm$ 6                                    | 55 $\pm$ 10                                     |
| Sex (M/F)                            | 13/10                                         | 13/8                                            |
| Tobacco consumption (yes/no)         | 0                                             | 5/21                                            |
| Tobacco consumption, pack-yr         | 0                                             | 7.6 $\pm$ 15                                    |
| FEV1, before bronchodilation (%pred) | na                                            | 64 $\pm$ 27.3                                   |
| FEV1, after bronchodilation (%pred)  | na                                            | 74 $\pm$ 24.6                                   |
| FEV1/FVC %                           | na                                            | 57.4 $\pm$ 18.9                                 |
| Asthma duration (years)              | na                                            | 23.2 $\pm$ 15.2                                 |
| Receiving inhaled steroids, no.      | 0                                             | 21                                              |
| <i>Fluticasone (mg)</i>              |                                               | 750 $\pm$ 273.9                                 |
| <i>Budesonide (mg)</i>               |                                               | 512 $\pm$ 165.2                                 |
| Receiving oral steroids, (yes/no).   | 0                                             | 6/14                                            |
| oral steroids dose/day (mg)          |                                               | 17.5 $\pm$ 10.8                                 |
| Atopy (yes/no)                       | 0                                             | 12/9                                            |
| Reversibility (yes/no)               | na                                            | 12/9                                            |
| Reversibility (ml)                   |                                               | 367.9 $\pm$ 145.5                               |
| Total peripheral blood neutrophils   | 4.2 $\pm$ 0.3 x 10 <sup>9</sup><br>cells /L   | 6.4 $\pm$ 1.2 x 10 <sup>9</sup><br>cells /L*    |
| Total peripheral blood eosinophils   | 0.09 $\pm$ 0.01 x 10 <sup>9</sup><br>cells /L | 0.085 $\pm$ 0.03 x 10 <sup>9</sup><br>cells /L* |

**Table S3.** Maximal percentage of inhibition of IL-8 and MMP-9 release from isolated peripheral blood neutrophils from healthy subjects, severe asthma and COPD patients. Neutrophils were incubated with LAS194046 (0.01nM-1 $\mu$ M) or fluticasone propionate (FLUT; 0.1nM-1 $\mu$ M) in response to LPS (1 $\mu$ g/ml). Sputum neutrophils from COPD patients were stimulated with cigarette smoke extract (CSE 5%). The levels of IL-8 and MMP-9 in the cell supernatant were determined, and the maximal % of inhibition of IL-8 and MMP-9 release by LAS194046 and FLUT were calculated. Values are mean  $\pm$  SD of 3 independent experiments run in triplicate. \*p < 0.05 vs healthy Subjects values.

| Neutrophils       | Stimulus | Treatment | Maximal % inhibition |                    |                   |
|-------------------|----------|-----------|----------------------|--------------------|-------------------|
|                   |          |           | Healthy              | COPD               | Asthma            |
| IL-8<br>(blood)   | LPS      | LAS194046 | 70.54 $\pm$ 15       | 58.95 $\pm$ 22.64  | 45.1 $\pm$ 7.5*   |
|                   |          | FLUT      | 99.01 $\pm$ 2.26     | 66.57 $\pm$ 7.45*  | 50.77 $\pm$ 5.43* |
| MMP-9<br>(blood)  | LPS      | LAS194046 | 98.1 $\pm$ 14.86     | 97.68 $\pm$ 3.29   | 63.44 $\pm$ 2.44* |
|                   |          | FLUT      | 90.85 $\pm$ 7.66     | 62.09 $\pm$ 3.79*  | 42.72 $\pm$ 6.25* |
| IL-8<br>(sputum)  | CSE      | LAS194046 |                      | 57.27 $\pm$ 10.13* |                   |
|                   |          | FLUT      |                      | 40.12 $\pm$ 10.30  |                   |
| MMP-9<br>(sputum) | CSE      | LAS194046 |                      | 74.34 $\pm$ 3.09*  |                   |
|                   |          | FLUT      |                      | 42.14 $\pm$ 9.23   |                   |

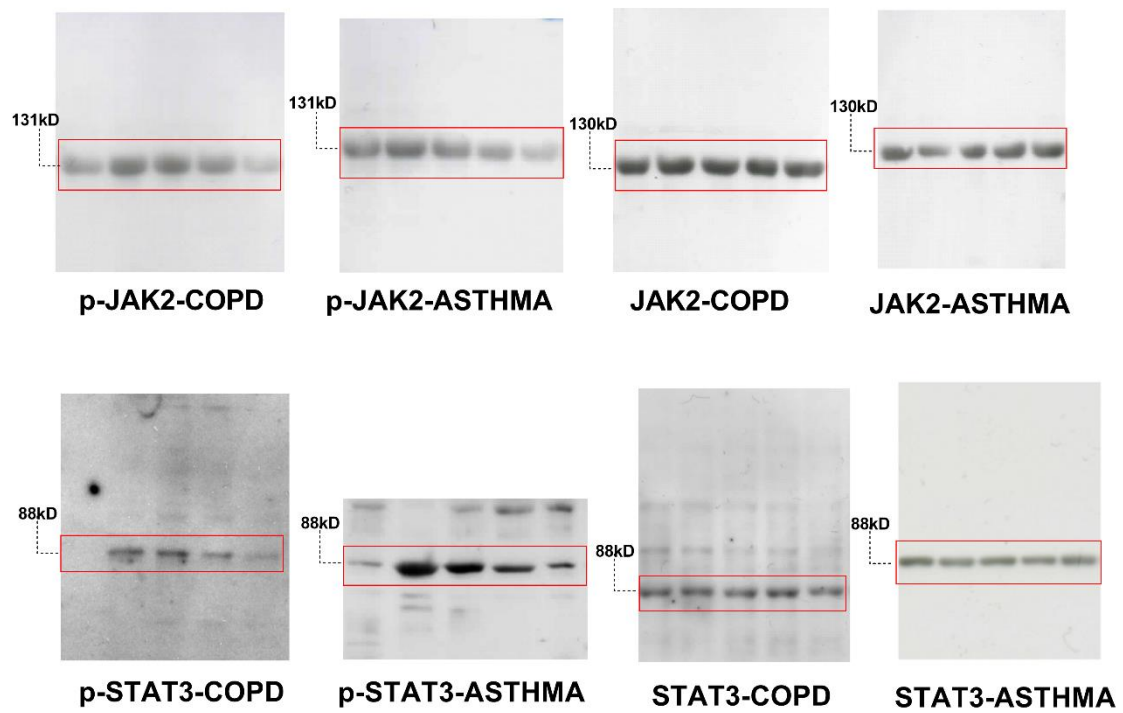

**Supplementary figure 1**

**Supplementary figure S1.** Uncropped Western blots from Figure 9. Immunoblots as shown in Fig. 9A. Cropped inserts shown in main figures are demarcated by red box. Samples were derived from the same experiment and blots were processed in parallel.

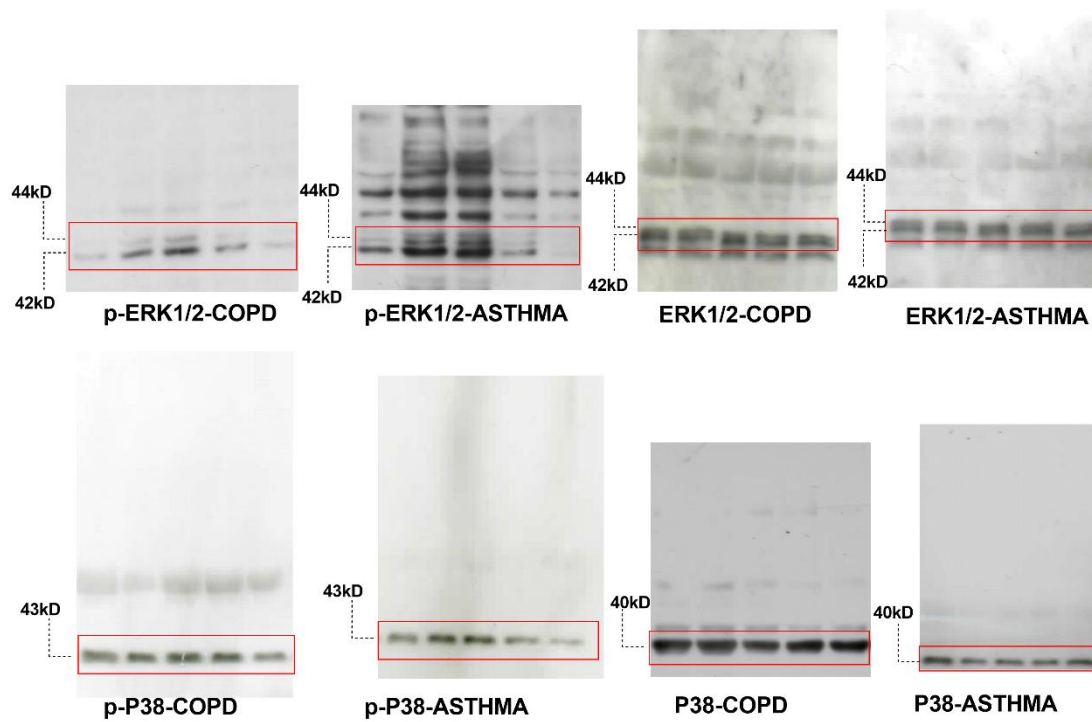

**Supplementary figure 2**

**Supplementary figure S2.** Uncropped Western blots from Figure 9. Immunoblots as shown in Fig. 9B. Cropped inserts shown in main figures are demarcated by red box. Samples were derived from the same experiment and blots were processed in parallel.
